# Supplementary material for: Evaluation of Retinal Function and Pathology After Intravitreal Injection of Povidone-Iodine and Polyvinyl Alcohol-Iodine in Rabbits
Source: PubMed Central journal article supplement (PMC7401888; doi:10.1167/tvst.9.5.5), 2020-04-15
Supplement: tvst-9-5-5_s001.pdf [file tvst-9-5-5_s001.pdf]

**Table 1 Ratios of wave amplitude in iodine-injected eye to saline-injected control eye for various ERG components induced by various stimuli before intravitreal injection and 1, 7 and 14 days after injection.**

| Group    | Day | Dark-adapted              |                          |             |             |                           |             | Light-adapted            |             |              |
|----------|-----|---------------------------|--------------------------|-------------|-------------|---------------------------|-------------|--------------------------|-------------|--------------|
|          |     | 0.01 cd·s·m <sup>-2</sup> | 3.0 cd·s·m <sup>-2</sup> |             |             | 10.0 cd·s·m <sup>-2</sup> |             | 3.0 cd·s·m <sup>-2</sup> |             | 30Hz Flicker |
|          |     |                           | a-wave                   | b-wave      | OPs         | a-wave                    | b-wave      | a-wave                   | b-wave      |              |
| PAI-0.05 | pre | 0.97±0.10                 | 1.00±0.08                | 0.98±0.06   | 0.96±0.10   | 1.00±0.09                 | 0.97±0.07   | 0.93±0.23                | 0.99±0.10   | 1.00±0.09    |
|          | 1   | 1.04±0.24                 | 1.07±0.22                | 1.03±0.21   | 1.10±0.26   | 1.16±0.24                 | 1.11±0.24   | 1.79±1.01                | 1.15±0.27   | 1.10±0.26    |
|          | 7   | 0.98±0.12                 | 1.10±0.36                | 1.00±0.15   | 1.07±0.15   | 1.00±0.13                 | 1.13±0.33   | 1.38±0.71                | 1.12±0.19   | 1.04±0.16    |
|          | 14  | 0.94±0.11                 | 0.93±0.12                | 0.97±0.06   | 0.89±0.11   | 0.99±0.12                 | 0.96±0.11   | 1.09±0.23                | 0.94±0.06   | 0.97±0.09    |
| PAI-0.1  | pre | 1.00±0.05                 | 1.01±0.09                | 0.98±0.08   | 1.02±0.07   | 1.05±0.04                 | 1.02±0.06   | 1.09±0.43                | 1.04±0.08   | 1.06±0.10    |
|          | 1   | 0.97±0.15                 | 0.95±0.10                | 1.01±0.13   | 0.91±0.20   | 0.99±0.04                 | 0.99±0.16   | 0.85±0.18                | 0.94±0.07   | 0.99±0.12    |
|          | 7   | 1.05±0.12                 | 1.06±0.14                | 1.06±0.11   | 1.10±0.18   | 1.10±0.09                 | 1.07±0.10*  | 1.15±0.65                | 1.12±0.14   | 1.15±0.32    |
|          | 14  | 0.99±0.18                 | 0.98±0.12                | 1.02±0.16   | 1.08±0.20   | 1.04±0.12                 | 1.03±0.13   | 1.16±0.31                | 1.01±0.13   | 1.05±0.17    |
| PAI-0.2  | pre | 1.07±0.06                 | 1.15±0.12                | 1.10±0.10   | 1.11±0.15   | 1.12±0.12                 | 1.06±0.08   | 1.13±0.19                | 1.10±0.08   | 1.12±0.08    |
|          | 1   | 0.87±0.13                 | 1.20±0.23                | 0.93±0.15   | 1.21±0.43   | 1.25±0.42                 | 0.94±0.16   | 0.92±0.56                | 0.94±0.16   | 0.98±0.16    |
|          | 7   | 0.95±0.11                 | 1.02±0.13                | 1.01±0.12   | 1.20±0.15   | 1.02±0.12                 | 1.04±0.12   | 1.08±0.25                | 1.08±0.14   | 1.03±0.15    |
|          | 14  | 0.98±0.15                 | 0.93±0.10                | 0.97±0.16   | 1.17±0.22   | 1.01±0.15                 | 0.93±0.13   | 1.09±0.62                | 1.06±0.19   | 1.04±0.22    |
| PI-0.05  | pre | 0.97±0.08                 | 0.98±0.13                | 0.98±0.09   | 1.07±0.15   | 0.99±0.13                 | 0.98±0.10   | 1.33±0.41                | 1.05±0.16   | 1.03±0.09    |
|          | 1   | 0.98±0.09                 | 1.04±0.17                | 1.03±0.08   | 0.96±0.12   | 1.09±0.17                 | 1.03±0.05   | 1.07±0.36                | 1.06±0.11   | 1.16±0.12    |
|          | 7   | 0.98±0.09                 | 1.00±0.11                | 1.01±0.18   | 1.01±0.13   | 0.97±0.10                 | 1.01±0.08   | 1.01±0.40                | 1.07±0.09   | 1.06±0.09    |
|          | 14  | 1.01±0.07                 | 1.01±0.16                | 1.08±0.07   | 1.03±0.17   | 1.05±0.20                 | 1.06±0.10   | 1.16±0.48                | 1.06±0.14   | 1.07±0.22    |
| PI-0.1   | pre | 1.03±0.06                 | 1.04±0.11                | 1.07±0.08   | 1.07±0.15   | 1.06±0.12                 | 1.08±0.06   | 1.31±0.28                | 1.10±0.12   | 1.07±0.15    |
|          | 1   | 1.03±0.11                 | 1.10±0.10                | 1.01±0.10   | 0.93±0.18   | 1.02±0.11                 | 0.97±0.06   | 0.92±0.22                | 1.01±0.12   | 1.00±0.12    |
|          | 7   | 0.99±0.20                 | 0.99±0.16                | 1.01±0.18   | 1.01±0.24   | 1.04±0.15                 | 1.04±0.17   | 1.45±0.39                | 1.06±0.19   | 1.06±0.15    |
|          | 14  | 1.00±0.09                 | 0.98±0.07                | 0.99±0.13   | 1.14±0.13   | 1.07±0.19                 | 1.04±0.14   | 0.82±0.25                | 1.06±0.13   | 1.03±0.06    |
| PI-0.2   | pre | 1.07±0.09                 | 1.01±0.08                | 1.08±0.06   | 1.00±0.10   | 1.12±0.07                 | 1.09±0.10   | 1.32±0.26                | 1.11±0.12   | 1.11±0.16    |
|          | 1   | 0.94±0.21                 | 1.18±0.20                | 1.02±0.14   | 1.02±0.18   | 1.25±0.18                 | 1.08±0.23   | 1.35±0.62                | 1.02±0.22   | 1.07±0.23    |
|          | 7   | 0.85±0.21                 | 0.86±0.22                | 0.87±0.19   | 1.04±0.23   | 0.88±0.19                 | 0.90±0.20   | 1.12±0.34                | 0.99±0.23   | 0.97±0.23    |
|          | 14  | 0.87±0.18                 | 0.89±0.15                | 0.90±0.21   | 1.08±0.31   | 0.89±0.14                 | 0.85±0.16   | 1.06±0.27                | 1.02±0.18   | 0.97±0.17    |
| PI-0.5   | pre | 1.03±0.09                 | 1.07±0.05                | 1.05±0.06   | 1.06±0.13   | 1.03±0.06                 | 1.01±0.07   | 1.11±0.30                | 1.04±0.06   | 1.02±0.04    |
|          | 1   | 0.68±0.22**               | 1.24±0.29                | 0.74±0.22*  | 0.88±0.25   | 1.19±0.34                 | 0.83±0.24   | 0.74±0.20                | 0.74±0.24   | 0.85±0.29    |
|          | 7   | 0.53±0.07**               | 0.63±0.19**              | 0.53±0.06** | 0.75±0.12   | 0.60±0.08*                | 0.56±0.12** | 0.61±0.19*               | 0.63±0.09** | 0.62±0.07*   |
|          | 14  | 0.34±0.18**               | 0.41±0.21**              | 0.38±0.19** | 0.58±0.29** | 0.51±0.25**               | 0.41±0.17** | 0.58±0.39*               | 0.45±0.28** | 0.37±0.30**  |

ERGs were recorded according to the stimulus conditions of International Society for Clinical Electrophysiology of Vision guideline. Each component of the ERGs was calculated as the ratio of the left to right eye of the same animal (iodine-injected side / saline-injected side). Data are expressed as mean ± standard deviation of 6 animals. \**P* < 0.05 \*\**P* < 0.01, significantly different from each pre-injection by Bonferroni multiple comparisons. PAI = polyvinyl alcohol-iodine; PI = povidone iodine; -0.05, -0.1, -0.2, -0.5 = 0.05%, 0.1%, 0.2%, 0.5% of available iodine, respectively; pre = pre-injection; OPs = oscillatory potentials
